# Supplementary material
Source: publisher figshare collection journal article supplement (https://geolsoc.figshare.com/ndownloader/files/5425604)
Supplement: Supplementary file 1 [file 5425604]

"Table 7. Results of laser fusion 40Ar/39Ar dating of single crystals of anorthoclase from two pumice clasts, Morutot Tuff (= J-4) from upper part of Kaitio Member, Nachukui Formation. From Nanyangakipi, NW of Murotot, west of Lake Turkana, northern Kenya",,,,,,,,
,,,,,,,,
,,,,,,,,
Sample,36Ar/39Ar,37Ar/39Ar,40Ar/39Ar,K/Ca,40Ar*/39ArK,% 40Ar*,39Ar,Calculated age
,x 10-3,x 10-2,,,± c.v.,,10-14mol,Ma ± 1 s.d.
,,,,,,,,
"93-1063A anorthoclase; J = 4.419E-4 ± 0.25%; level 3, G432",,,,,,,,
1,3.636,1.112,3.071,47,1.978 ± 0.84%,64.4,1.27,1.576 ± 0.014
2,7.252,3.415,4.184,15,2.024 ± 1.45%,48.4,0.64,1.613 ± 0.024
3,2.094,3.373,2.652,16,2.017 ± 1.28%,76,1.12,1.607 ± 0.021
4,0.878,5.798,2.282,9,2.009 ± 1.68%,88,1,1.601 ± 0.027
5,0.649,3.087,2.242,17,2.033 ± 0.61%,90.7,0.8,1.620 ± 0.011
6,0.837,1.371,2.265,38,1.999 ± 0.69%,88.3,1,1.593 ± 0.012
[7,1.63,5.369,2.626,10,2.130 ± 1.12%,81.1,0.51,1.697 ± 0.019]
8,1.787,1.331,2.548,40,2.001 ± 0.54%,78.5,1.22,1.595 ± 0.009
,             Arithmetic mean K/Ca (n = 7),,,26 ± 15,                       Arithmetic mean age (n = 7),,,1.601 ± 0.015
,,,,,                          Weighted mean age (n = 7),,,1.599 ± 0.006
,,,,,,,,
"93-1063B anorthoclase; J = 4.416E-4 ± 0.25%; level 4, G432",,,,,,,,
1,1.792,1.246,2.578,42,2.030 ± 1.14%,78.7,0.78,1.617 ± 0.019
2,0.544,1.169,2.179,45,1.999 ± 0.62%,91.8,1.24,1.592 ± 0.011
3,1.073,1.628,2.338,32,2.003 ± 1.11%,85.7,0.75,1.595 ± 0.018
4,1.033,1.196,2.335,44,2.011 ± 0.44%,86.1,1.03,1.602 ± 0.008
5,7.515,1.163,4.217,45,1.977 ± 1.19%,46.9,1.03,1.575 ± 0.019
6,1.309,1.837,2.406,29,2.001 ± 0.93%,83.2,0.67,1.594 ± 0.015
7,0.954,1.146,2.298,46,1.997 ± 0.71%,86.9,1.1,1.590 ± 0.012
,               Arithmetic mean K/Ca (n = 7),,,40 ± 7,                        Arithmetic mean age (n = 7),,,1.595 ± 0.013
,,,,,                          Weighted mean age (n = 7),,,1.596 ± 0.006
,,,,,,,,
,,,,,,,,
l = 5.543 x 10-10 a-1 ,Sensitivity ~2.5 x 10-17 mol/mV,Bracketed results excluded from mean age calculation,,,,,,
(36Ar/37Ar)Ca = 3.50 x 10-4,(39Ar/37Ar)Ca = 7.86 x 10-4,(40Ar/39Ar)K = 0.020,,,,,,
40Ar* – radiogenic 40Ar,39ArK – K derived 39Ar,Quoted error for each age includes estimated error in J
"Mass of alkali feldspar used in each analysis in range:  93-1063A – 1.5 to 3.6 mg, 93-1063B – 1.7 to 3.7 mg",,
"Irradiated 24 hours in X33 or X34, HIFAR reactor",,
Fluence monitor 92-176 sanidine from Fish Canyon Tuff; K-Ar reference age:  28.1 Ma,,
